# Supplementary material for: Comparison of Kidney Transcriptomic Profiles of Early and Advanced Diabetic Nephropathy Reveals Potential New Mechanisms for Disease Progression
Source: Oxford University Press journal article supplement (doi:10.2337/db19-0204), 2019-10-02
Supplement: db190204supplementarydata5.xlsx [file db190204supplementarydata5.xlsx]

## Sheet: DEGs in glomerular cells
Symbol	Cell	early_vs_ctrl.p	early_vs_ctrl.Log2Rat	advanced_vs_early.p	advanced_vs_early.Log2Rat
ACKR1	Endothelial			1.2661e-07	3.19459
ACTN1	Mesangium			4.21154e-05	1.23367
AEBP1	Podocytes			6.10541e-05	1.38916
AMOTL1	Endothelial			7.56292e-07	0.792471
AQP1	Endothelial			0.000487473	-0.609579
ARHGAP28	Podocytes			0.000994006	-1.21475
B3GALT2	Podocytes	0.0092089	-0.700834
BGN	Mesangium			0.00408299	0.835902
C10orf10	Endothelial			0.000101434	0.734902
C11orf96	Mesangium	7.02141e-05	-1.6301	0.000176791	1.09856
C1QTNF1	Podocytes			6.89111e-05	1.11751
C1QTNF7	Podocytes			1.26723e-05	-1.31197
CALCA	Endothelial			0.00126548	-1.41174
CD300LG	Endothelial			0.00222709	-1.26359
CGNL1	Podocytes			1.93137e-05	-0.602098
CLEC1A	Endothelial	0.000132963	-1.01672
CLIC5	Podocytes			0.00298762	-1.42673
COL15A1	Endothelial			1.36238e-06	1.61407
COL4A1	Endothelial			3.6741e-05	1.54532
COL4A2	Endothelial			0.000556388	1.15206
CPE	Mesangium			0.0141633	0.645607
CTSV	Podocytes			0.000626355	-1.46959
CYP4B1	Endothelial			0.00881264	-0.869783
DCDC2	Podocytes			3.47182e-05	1.16438
DDN	Podocytes			0.00216829	-1.79872
EDNRB	Endothelial			2.49778e-05	0.888655
EGR1	Podocytes	3.36576e-08	-4.368	0.00448154	1.13033
ELK3	Endothelial			2.7092e-05	0.846623
FABP4	Endothelial	0.000469892	1.45775
FHL2	Mesangium			8.16722e-06	1.30264
GADD45B	Mesangium	0.000125631	-1.48425
GIMAP4	Endothelial			1.49718e-05	0.771294
GPX8	Podocytes			4.18402e-08	0.914032
GRASP	Endothelial	0.00836391	-0.678717
HIST1H2BF	Podocytes			0.00236264	1.06477
HSPB8	Podocytes			0.000635198	0.780506
HTRA1	Podocytes			0.00389793	-0.619912
ITGA3	Podocytes			0.00544455	0.729964
KLF6	Podocytes	0.00115669	-1.61142	8.06681e-06	0.995426
LOXL2	Podocytes			0.000119474	1.04981
MAGI2	Podocytes			7.74768e-05	-0.815177
MARVELD1	Podocytes			0.000133722	0.688438
MAT2A	Endothelial			0.000990077	-0.59227
MUSTN1	Mesangium			0.00124333	-0.652924
MYL12A	Podocytes			4.17013e-05	0.753918
MYOF	Podocytes			4.40304e-06	1.42642
NAP1L1	Podocytes			9.78695e-06	0.681045
NBL1	Podocytes			0.000179614	0.709673
NET1	Mesangium			0.00173547	-0.606908
NPHS1	Podocytes			0.0175761	-1.51325
NPR3	Podocytes			0.00072316	-0.88567
NR4A2	Mesangium	3.15357e-07	-4.21004
NRP1	Endothelial			2.25206e-05	1.10034
PCDH17	Endothelial			0.0170802	0.645694
PCOLCE	Podocytes			3.77478e-05	0.832555
PDLIM2	Podocytes			0.000398317	-0.632032
PECAM1	Endothelial			1.82129e-06	0.659274
PLEKHH2	Podocytes			0.00786138	0.647375
PLK2	Endothelial			2.21608e-06	1.32476
PLSCR1	Endothelial			2.29548e-05	0.840449
PTH1R	Podocytes			5.00922e-05	-0.938017
PTPRO	Podocytes			0.00793676	-1.17506
RARRES1	Podocytes			4.10029e-05	1.82457
RASD1	Mesangium	0.000144852	-2.06319	0.00589726	1.4144
RGS4	Mesangium			2.66407e-05	1.77004
RHOJ	Endothelial			0.000733699	0.788544
RRAD	Mesangium	0.0416	-0.633315	0.00177186	0.679005
S100A10	Endothelial			5.6338e-05	1.04112
S100A13	Endothelial			0.00349127	0.641889
SERPING1	Mesangium			0.00013568	1.07749
SLC43A3	Endothelial			3.69388e-05	1.14817
SLFN5	Endothelial			6.70865e-06	1.2542
SNCAIP	Podocytes			0.000874712	0.710212
STMN2	Endothelial			0.00200715	2.57685
SULF1	Podocytes			9.61592e-05	1.21562
TAGLN	Mesangium			0.000116959	0.938223
TAGLN2	Endothelial			2.10038e-05	0.892971
TGM2	Endothelial	0.0104495	-0.824735	2.40298e-05	1.74424
TMEM2	Endothelial			0.000213043	0.811823
TMEM54	Podocytes			2.61584e-05	1.1841
TPM2	Mesangium			0.00126472	0.737591
VEGFA	Podocytes			8.40493e-05	-0.830348
VWF	Endothelial			4.02441e-05	1.80967
WT1	Podocytes			0.00232593	-1.21412

## Sheet: DEGs in tubular cells
Symbol	Cell	early_vs_ctrl.p	early_vs_ctrl.Log2Rat	advanced_vs_early.p	advanced_vs_early.Log2Rat
EGF	Other_Tubules			1.25952e-05	-2.46282
TRPM6	Other_Tubules			0.000283733	-2.45676
SLC6A18	Proximal_tubule			0.00478912	-2.33438
SLC7A13	Proximal_tubule	0.00650997	1.24555	0.00198365	-1.86374
PVALB	Other_Tubules			0.0003777	-1.7477
CYP2J2	Other_Tubules	0.00892745	1.00366	0.000405491	-1.70174
SLC12A3	Other_Tubules			0.00910786	-1.68675
RHCG	Collecting_Duct			0.000529193	-1.64799
SYN2	Collecting_Duct			0.000599735	-1.59356
TTC36	Proximal_tubule			7.09877e-05	-1.58232
SLC22A8	Proximal_tubule			0.00162041	-1.4953
OXGR1	Collecting_Duct			0.000570936	-1.45641
MIOX	Proximal_tubule			0.00146297	-1.44373
HAO2	Proximal_tubule			0.000871124	-1.41858
ALDH6A1	Proximal_tubule			8.89711e-05	-1.40263
PIPOX	Proximal_tubule			0.00064021	-1.38357
CYP2E1	Proximal_tubule	0.00917298	0.793939	0.000426635	-1.36955
CUBN	Proximal_tubule			0.000271769	-1.33654
TMEM174	Proximal_tubule			0.00223914	-1.33325
PRODH	Proximal_tubule			4.99551e-05	-1.31758
GLOD5	Other_Tubules			0.00281457	-1.31016
G6PC	Proximal_tubule			0.00359754	-1.30839
ACY3	Proximal_tubule	0.000138577	0.695281	0.000207002	-1.28847
SLC4A9	Collecting_Duct			0.0046002	-1.28068
RNF152	Collecting_Duct			0.000415931	-1.27117
AOC1	Collecting_Duct			0.00680079	-1.26649
DAO	Proximal_tubule			0.000660486	-1.25897
SLC6A19	Proximal_tubule			0.000375251	-1.25683
ASPA	Proximal_tubule			0.000257304	-1.25565
ASS1	Proximal_tubule			0.00115605	-1.23875
UGT3A2	Proximal_tubule			5.12889e-05	-1.23592
MLXIPL	Proximal_tubule			0.000172249	-1.23447
SORD	Proximal_tubule			0.000124599	-1.23153
ALDH1L1	Collecting_Duct			1.94426e-05	-1.21261
KHK	Proximal_tubule			0.000206326	-1.17733
TMEM52B	Other_Tubules			0.00126667	-1.17591
KNG1	Other_Tubules			0.00107153	-1.17353
VDR	Other_Tubules			0.000690697	-1.171
ATP6V0D2	Collecting_Duct			0.00124979	-1.1628
SLC34A1	Proximal_tubule			0.00217408	-1.15784
AMN	Proximal_tubule			0.000130636	-1.14972
SLC13A3	Proximal_tubule			0.000336721	-1.14812
PCK1	Proximal_tubule			0.00295925	-1.13806
RALYL	Collecting_Duct			0.000344383	-1.13164
PAH	Proximal_tubule			0.00151864	-1.10874
ATP6V1B1	Collecting_Duct			0.00358583	-1.08901
SLC22A6	Proximal_tubule			0.000152041	-1.08647
SELENBP1	Other_Tubules			0.000164563	-1.07095
GPD1	Proximal_tubule			0.000445381	-1.05954
ACADSB	Other_Tubules			0.000371968	-1.05464
KL	Other_Tubules			0.00166299	-1.04904
ALDOB	Proximal_tubule			0.000993373	-1.04802
KCNJ10	Other_Tubules			0.000372996	-1.04304
CLDN8	Collecting_Duct			0.000425727	-1.02631
HNF4A	Proximal_tubule			0.000512314	-1.01907
SLC4A4	Proximal_tubule			0.00102197	-1.01832
HMGCS2	Collecting_Duct			0.00494223	-1.01154
FMO1	Proximal_tubule			0.00448267	-0.995122
FGF9	Other_Tubules			2.64965e-05	-0.992551
XYLB	Proximal_tubule			8.02096e-05	-0.991905
GHR	Proximal_tubule			5.20379e-05	-0.987776
IDH1	Proximal_tubule			0.00208965	-0.987066
CGREF1	Proximal_tubule	0.000549292	0.73075	7.79749e-05	-0.984969
BPHL	Proximal_tubule			0.00112553	-0.982929
GLYAT	Proximal_tubule			0.00145654	-0.981578
HADH	Other_Tubules			0.00137044	-0.960351
FOXI1	Collecting_Duct			0.00085113	-0.950357
KCTD8	Collecting_Duct			0.000366796	-0.946035
CMBL	Proximal_tubule			0.00217494	-0.939022
ATP6V1G3	Collecting_Duct			0.00800385	-0.927149
PHYH	Other_Tubules			0.00214213	-0.914673
ABHD6	Other_Tubules			0.000272551	-0.909682
ALDH8A1	Proximal_tubule			0.000897754	-0.900375
TMPRSS2	Other_Tubules			0.000123915	-0.898607
SLC4A1	Collecting_Duct			0.00328413	-0.897869
RHBG	Collecting_Duct			0.000195813	-0.882367
HYKK	Proximal_tubule			0.000231332	-0.877515
LDHD	Proximal_tubule			0.000269351	-0.876794
SUCLG1	Other_Tubules			0.00369523	-0.87662
AQP6	Collecting_Duct			0.00809947	-0.858014
CLCNKB	Other_Tubules			0.000376657	-0.854965
HAGH	Other_Tubules			0.00100507	-0.838542
SMIM24	Proximal_tubule			0.0114109	-0.833528
HSD11B2	Collecting_Duct			0.00110579	-0.832311
DPYS	Proximal_tubule			0.00545765	-0.8315
CWH43	Other_Tubules			0.00211665	-0.829405
SLC26A1	Proximal_tubule			0.000496245	-0.827489
SLC2A2	Proximal_tubule			0.0151981	-0.824252
GCDH	Proximal_tubule			0.00194621	-0.819254
FITM1	Proximal_tubule			0.0066438	-0.800238
NAT8	Proximal_tubule			0.0101461	-0.793969
CNNM2	Other_Tubules			2.15696e-05	-0.787017
PDZK1	Proximal_tubule			0.00192313	-0.785772
TMEM213	Other_Tubules			0.00169369	-0.77978
NUDT4	Other_Tubules			2.30644e-05	-0.779263
RAB11FIP3	Proximal_tubule			0.000143832	-0.777863
SCNN1B	Collecting_Duct			0.00836646	-0.769364
CHPT1	Proximal_tubule			0.00671874	-0.755575
CYFIP2	Collecting_Duct			1.32126e-05	-0.754591
SHMT1	Other_Tubules			0.00015058	-0.748753
C11orf54	Proximal_tubule			0.000443281	-0.733278
ECHS1	Other_Tubules			0.00417541	-0.716336
HEPACAM2	Collecting_Duct			0.0111491	-0.71569
SLC27A2	Proximal_tubule			0.0193304	-0.709682
ABCD3	Other_Tubules			6.3134e-05	-0.702379
MPC1	Other_Tubules			0.00350383	-0.696818
DNASE1	Proximal_tubule			3.65289e-06	-0.693698
TRPM3	Collecting_Duct			0.000864584	-0.687375
PTGFR	Other_Tubules	0.00924248	-0.68155	0.0181092	-0.679655
KIAA1191	Proximal_tubule			0.000431327	-0.678827
TCEA3	Proximal_tubule			0.000274856	-0.677389
ACO2	Other_Tubules			1.23915e-05	-0.675901
C21orf33	Other_Tubules			0.000940175	-0.673181
HPN	Other_Tubules			0.000237915	-0.664674
PECR	Proximal_tubule			0.00144129	-0.664264
ACOT13	Other_Tubules			0.0021238	-0.662376
ACAT1	Other_Tubules			0.0114821	-0.653712
QDPR	Proximal_tubule			0.0103198	-0.648679
CHCHD10	Other_Tubules			0.00301091	-0.642664
BCKDHB	Other_Tubules			0.000202017	-0.639242
FOLR1	Proximal_tubule			0.00171151	-0.637047
AKR7A2	Proximal_tubule			0.00261554	-0.636004
ACOX1	Proximal_tubule			1.50757e-05	-0.632566
CHDH	Proximal_tubule			0.00012209	-0.626655
FAHD1	Other_Tubules			0.00574329	-0.625758
TOX3	Other_Tubules			0.00055691	-0.621799
CA12	Collecting_Duct			0.00509481	-0.619761
TMEM72	Other_Tubules			0.00115631	-0.6157
WNK4	Other_Tubules			0.00503763	-0.615329
ATP6V1C2	Collecting_Duct			0.000663486	-0.610103
ABHD14B	Other_Tubules			0.000403417	-0.608337
CAT	Proximal_tubule			0.000319211	-0.604675
SDHB	Other_Tubules			0.0111966	-0.60441
SLC22A12	Proximal_tubule			0.00716689	-0.598996
KCNJ1	Other_Tubules			0.00551611	-0.590769
SFXN1	Proximal_tubule			0.000600333	-0.582534
ETFB	Other_Tubules			0.00747751	-0.581246
KRT19	Collecting_Duct			0.000107094	0.635683
ZMYND10	Proximal_tubule			0.00021379	0.641986
ST6GAL1	Collecting_Duct			0.000131918	0.667323
ITGB8	Proximal_tubule			1.31331e-05	0.690352
INMT	Proximal_tubule			0.00158591	0.711121
KRT7	Collecting_Duct			0.00360854	0.748005
GDF15	Collecting_Duct	3.59177e-06	-2.02736	0.00543935	0.772198
MID1	Collecting_Duct			2.10148e-05	0.803192
SPP1	Other_Tubules			0.00778584	0.806408
SOD2	Other_Tubules			4.15155e-05	0.875106
PAPPA	Collecting_Duct			4.79466e-05	0.87829
RAB27A	Other_Tubules			9.02037e-06	1.00346
TNFSF10	Proximal_tubule	0.00240914	-0.68442	1.27607e-05	1.07174
PIGR	Proximal_tubule			0.000306065	1.09035
CLDN4	Other_Tubules			2.7693e-05	1.11933
CLU	Other_Tubules			1.93938e-06	1.30699
CDH6	Proximal_tubule			1.67608e-05	1.3948
WFDC2	Other_Tubules			1.66511e-06	2.43085
PDK4	Collecting_Duct	0.00971315	-1.40372
FMO2	Proximal_tubule	0.00239902	0.843306
PPP1R1A	Other_Tubules	0.0177039	0.946257
